# Supplementary material for: Surface doping of La ions into ZnO nanocrystals to lower the optimal working temperature for HCHO sensing properties
Source: Royal Society of Chemistry journal article supplement (doi:10.1039/c5cp04816h), 2015-01-01
Supplement: c5cp04816h1.pdf [file c5cp04816h1.pdf]

The supporting materials for

# **Surface doping of La ions into ZnO nanocrystals to lower the optimal working temperature for HCHO sensing properties**

Shouqin Tian <sup>a, b</sup>, Yupeng Zhang <sup>c</sup>, Dawen Zeng <sup>b, \*</sup>, Hao Wang <sup>b</sup>, Neng Li <sup>a, \*</sup>, Changsheng Xie <sup>b</sup>,

Chunxu Pan <sup>c</sup>, Xiujian Zhao <sup>a</sup>

<sup>a</sup> State Key Laboratory of Silicate Materials for Architectures, Wuhan University of Technology

(WUT), No. 122, Luoshi Road, Wuhan 430070, PR China

<sup>b</sup> State Key Laboratory of Materials Processing and Die & Mould Technology, Nanomaterials and

Smart Sensors Research Lab (NSSRL), Department of Materials Science and Engineering, Huazhong

University of Science and Technology (HUST), No. 1037, Luoyu Road, Wuhan 430074, PR China

<sup>c</sup> School of Physics and Technology, Center for Electron Microscopy and MOE Key Laboratory of

Artificial Micro- and Nano-structures, Wuhan University, Wuhan 430072, PR China

\* Corresponding author. Tel.: +86-027-87559835; Fax: +86-027-87543778.

E-mail address: [dwzeng@mail.hust.edu.cn](mailto:dwzeng@mail.hust.edu.cn) (D. Zeng); [lineng@whut.edu.cn](mailto:lineng@whut.edu.cn) (N. Li)

As is well known, EPR measurement is a very good method to characterize the surface defect. Thus, our samples were subjected to this characterization and the EPR results are shown in Figure S1. The only one single EPR signal at  $g \sim 1.9590$  can be observed and is probably attributed to singly ionized oxygen vacancies ( $V_o^\bullet$ ) produced from  $V_o^\times$  by light excitation.<sup>1,2</sup> It can be seen that La0.05-ZnO exhibits a much lower EPR signal intensity than pure ZnO, indicating that La0.05-ZnO has more oxygen vacancies than pure ZnO. In this sense, La doping can reduce the amount of oxygen vacancies, which is in accord with the above PL results.

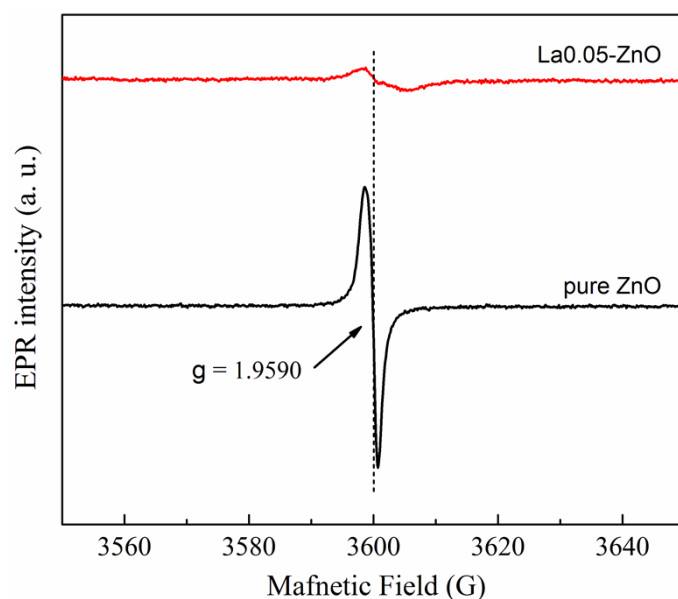

**Figure S1** EPR spectra measured at room temperature from pure ZnO and La0.05-ZnO.

Reference:

(1) Kaftelen, H.; Ocakoglu, K.; Thomann, R.; Tu, S.; Weber, S.; Erdem, E. EPR and Photoluminescence Spectroscopy Studies on The Defect Structure of ZnO Nanocrystals. *Phys. Rev. B* **2012**, *86*, 014113.

(2) Janotti, A.; Van de Walle, C.G. Native Point Defects in ZnO. *Phys. Rev. B* **2007**, *76*, 165202.
